# Supplementary material for: High-Sensitive TRBC1-Based Flow Cytometric Assessment of T-Cell Clonality in Tαβ-Large Granular Lymphocytic Leukemia
Source: MDPI journal article supplement (doi:10.3390/cancers14020408), 2022-01-14
Supplement: s1 [file s1]

# Supplementary Material: High-Sensitive TRBC1-Based Flow Cytometric Assessment of T-Cell Clonality in T $\alpha\beta$ -Large Granular Lymphocytic Leukemia

Noemí Muñoz-García, F. Javier Morán-Plata, Neus Villamor, Margarida Lima<sup>†</sup>, Susana Barrena, Sheila Mateos, Carolina Caldas, Jacques J.M. van Dongen, Alberto Orfao and Julia Almeida

**Protocol S1.** Combining sample aliquots stained with a CD45 antibody conjugated to 8 different fluorochromes into only two antibody combinations ready to be measured in the flow cytometer.

1. Prepare 1 to 8 tubes with 100  $\mu$ L of peripheral blood
2. Add the appropriate volume of each TCRV $\beta$ , CD45, and TRBC1 antibodies per tube (as described in Supplementary Table 1, Panel II) in combination with 50  $\mu$ L/tube of Brilliant Stain Buffer (Becton/Dickinson Biosciences (BD), San Jose, CA)
3. Mix well, preferably by gently vortexing
4. Incubate for 30 min at room temperature (RT) protected from light
5. Add 2 mL of washing buffer to the cell pellet
6. Mix well, preferably by gently vortexing
7. Centrifuge for 5 min at 540 g
8. Discard the supernatant using a Pasteur pipette or vacuum system without disturbing the cell pellet, leaving approximately 50  $\mu$ L residual volume in each tube
9. Mix well, preferably by gently vortexing
10. Combine cells from tubes 1-4 and from tubes 5-8 into two single tubes, respectively; for this purpose, wash the 8 tubes from the first set of tubes with washing buffer to recover all cells that might have been left in the original tubes.
11. Centrifuge for 5 min at 540 g
12. Discard the supernatant using a Pasteur pipette or vacuum system without disturbing the cell pellet, leaving approximately 50  $\mu$ L residual volume in each tube
13. Mix well, preferably by gently vortexing
14. Add the appropriate volume of the remaining antibodies to the two tubes
15. Mix well, preferably by gently vortexing
16. Incubate for 20 min at RT protected from light
17. Add 2 mL of 1X FACS Lysing Solution — 10X FACS Lysing Solution (BD) diluted 1/10 vol/vol in distilled water, following the recommendations of the manufacturer—
18. Mix well, preferably by gently vortexing
19. Incubate for 15 min at RT protected from light
20. Centrifuge for 5 min at 540 g
21. Discard the supernatant using a Pasteur pipette or vacuum system without disturbing the cell pellet, leaving approximately 50  $\mu$ L residual volume in each tube
22. Mix well, preferably by gently vortexing
23. Add 2 mL of washing buffer to the cell pellet
24. Mix well, preferably by gently vortexing
25. Centrifuge for 5 min at 540 g
26. Discard the supernatant using a Pasteur pipette or vacuum system without disturbing the cell pellet, leaving approximately 50  $\mu$ L residual volume in each tube
27. Mix well, preferably by gently vortexing
28. Resuspend the cell pellet in 200  $\mu$ L of acquisition buffer

29. Acquire the cells (preferably) immediately after staining or store at 4°C for a maximum of 1 hour until measured in the flow cytometer

**Table S1.** Panels of fluorochrome-conjugated antibody reagents used in this study.

| Panel I. Analysis of TRBC1 expression on different maturation-associated subsets of total Tαβ-cells and their major subsets                                                            |            |        |       |         |       |            |          |           |          |         |                |             |                |           |               |       |             |       |
|----------------------------------------------------------------------------------------------------------------------------------------------------------------------------------------|------------|--------|-------|---------|-------|------------|----------|-----------|----------|---------|----------------|-------------|----------------|-----------|---------------|-------|-------------|-------|
| BUV66<br>1                                                                                                                                                                             | BUV73<br>7 | BV421  | PacB  | BV510   | BV605 | BV650      | BV711    | BV786     | FITC     | PE      | PerCP<br>Cy5.5 | PECF59<br>4 | PECy7          | AF700     | APC<br>Vio770 |       |             |       |
| CD7                                                                                                                                                                                    | TRBC1      | CD27   | CD2   | CD45RA  | CD4   | CD62L      | CD1<br>6 | CD3       | CD5<br>7 | cyGra   | CD28           | CD8         | TCRγδ          | CD45      | CD56          |       |             |       |
| Panel II. Analysis of TRBC1 expression per TCRVβ-family (using the IOTest® Beta Mark TCR Vβ Repertoire Kit-Beckman Coulter) among different maturation-associated subsets of Tαβ-cells |            |        |       |         |       |            |          |           |          |         |                |             |                |           |               |       |             |       |
| BUV395                                                                                                                                                                                 | BUV661     | BUV805 | BV421 | PacB    | BV480 | BV510      | BV605    | BV650     | BV786    | FITC    | PE             | PerCP       | PerCP<br>Cy5.5 | PECy7     | PE<br>Vio615  | Dy634 | APC<br>R700 | APCH7 |
| CD<br>8                                                                                                                                                                                | CD<br>7    | CD45   | CD27  | CD<br>2 |       | CD45R<br>A | CD<br>4  | CD62<br>L | CD<br>3  | TCRVβ A |                |             | CD28           | TCRγ<br>δ | NKp80         | TRBC1 | CD<br>5     |       |
| CD<br>8                                                                                                                                                                                | CD<br>7    |        | CD27  | CD<br>2 | CD45  | CD45R<br>A | CD<br>4  | CD62<br>L | CD<br>3  | TCRVβ B |                |             | CD28           | TCRγ<br>δ | NKp80         | TRBC1 | CD<br>5     |       |
| CD<br>8                                                                                                                                                                                | CD<br>7    |        | CD27  | CD<br>2 |       | CD45R<br>A | CD<br>4  | CD62<br>L | CD<br>3  | TCRVβ C | CD45           | CD28        | CD28           | TCRγ<br>δ | NKp80         | TRBC1 | CD<br>5     |       |
| CD<br>8                                                                                                                                                                                | CD<br>7    |        | CD27  | CD<br>2 |       | CD45R<br>A | CD<br>4  | CD62<br>L | CD<br>3  | TCRVβ D |                |             | CD28           | TCRγ<br>δ | NKp80         | TRBC1 | CD<br>5     | CD45  |
| CD<br>8                                                                                                                                                                                | CD<br>7    | CD45   | CD27  | CD<br>2 |       | CD45R<br>A | CD<br>4  | CD62<br>L | CD<br>3  | TCRVβ E |                |             | CD28           | TCRγ<br>δ | NKp80         | TRBC1 | CD<br>5     |       |
| CD<br>8                                                                                                                                                                                | CD<br>7    |        | CD27  | CD<br>2 | CD45  | CD45R<br>A | CD<br>4  | CD62<br>L | CD<br>3  | TCRVβ F |                |             | CD28           | TCRγ<br>δ | NKp80         | TRBC1 | CD<br>5     |       |
| CD<br>8                                                                                                                                                                                | CD<br>7    |        | CD27  | CD<br>2 |       | CD45R<br>A | CD<br>4  | CD62<br>L | CD<br>3  | TCRVβ G | CD45           | CD28        | CD28           | TCRγ<br>δ | NKp80         | TRBC1 | CD<br>5     |       |
| CD<br>8                                                                                                                                                                                | CD<br>7    |        | CD27  | CD<br>2 |       | CD45R<br>A | CD<br>4  | CD62<br>L | CD<br>3  | TCRVβ H |                |             | CD28           | TCRγ<br>δ | NKp80         | TRBC1 | CD<br>5     | CD45  |

For all tubes, “stain & lyse” EuroFlow SOPs were used ([www.EuroFlow.com](http://www.EuroFlow.com)), with the modifications described in Supplementary Protocol 1. Abbreviations (alphabetical order): APC, allophycocyanin; H7, Hilite®7; BD, Becton/Dickinson Biosciences; BV, Brilliant Violet™; cy, cytoplasmic; Dy, dyomics; FITC, fluorescein isothiocyanate; Gra, granzyme B; PacB, Pacific Blue™; PE, phycoerythrin; Cy5.5, cyanin 5.5; Cy7, cyanin 7; PerCP, peridinin-chlorophyll protein; TCR, T-cell receptor.

**Table S2.** Sources and specificities of the monoclonal antibody reagents used in this study.

| Marker | Fluorochrome | Clone  | Manufacturer | Volume (μL) |
|--------|--------------|--------|--------------|-------------|
| CD2    | PacB         | TS1/8  | BioLegend    | 1           |
| CD3    | BV786        | SK7    | BD           | 1           |
| CD4    | BV605        | SK3    | BD           | 1           |
| CD5    | APCR700      | UCHT2  | BD           | 3           |
| CD7    | BUV661       | M-T701 | BD           | 0.5         |
| CD8    | BUV395       | RPA-T8 | BD           | 5           |
| CD8    | PECF594      | RPA-T8 | BD           | 1           |
| CD16   | BV711        | 3G8    | BD           | 2.5         |
| CD27   | BV421        | MT271  | BD           | 2           |
| CD28   | PerCPCy5.5   | CD28.2 | BioLegend    | 5           |
| CD45   | BUV805       | HI30   | BD           | 5           |
| CD45   | BV480        | HI30   | BD           | 5           |
| CD45   | PerCP        | HI30   | BioLegend    | 5           |
| CD45   | AF700        | HI30   | BD           | 2.5         |
| CD45   | APCCy7       | MEM-28 | ExBio        | 5           |
| CD45RA | BV510        | HI100  | BD           | 2.5         |
| CD56   | APCVio770    | REA196 | Miltenyi     | 2           |
| CD57   | FITC         | HNK1   | BD           | 10          |
| CD62L  | BV605        | DREG56 | BioLegend    | 2.5         |
| CD62L  | BV650        | DREG56 | BioLegend    | 2.5         |

|             |           |           |                 |             |
|-------------|-----------|-----------|-----------------|-------------|
| Granzyme B  | PE        | GB11      | Sanquin         | 5           |
| NKp80       | PEVio615  | REA845    | Miltenyi        | 2           |
| TCRγδ       | PECy7     | 11F2      | BD              | 1           |
| TRBC1       | Dy634     | JOVI-1    | Immunostep      | 0.5         |
| TRBC1       | BUV737    | JOVI-1    | BD              | 1           |
| TCRVβ 5.3   | PE        | 3D11      | Beckman Coulter | 10 (Tube A) |
| TCRVβ 7.1   | PE + FITC | ZOE       | Beckman Coulter |             |
| TCRVβ 3     | FITC      | CH92      | Beckman Coulter |             |
| TCRVβ 9     | PE        | FIN9      | Beckman Coulter | 10 (Tube B) |
| TCRVβ 17    | PE + FITC | E17.5F3   | Beckman Coulter |             |
| TCRVβ 16    | FITC      | TAMAYA1.2 | Beckman Coulter |             |
| TCRVβ 18    | PE        | BA62.6    | Beckman Coulter | 10 (Tube C) |
| TCRVβ 5.1   | PE + FITC | IMMU157   | Beckman Coulter |             |
| TCRVβ 20    | FITC      | ELL1.4    | Beckman Coulter |             |
| TCRVβ 13.1  | PE        | IMMU222   | Beckman Coulter | 10 (Tube D) |
| TCRVβ 13.6  | PE + FITC | JU74.3    | Beckman Coulter |             |
| TCRVβ 8     | FITC      | 56C5.2    | Beckman Coulter |             |
| TCRVβ 5.2   | PE        | 36213     | Beckman Coulter | 10 (Tube E) |
| TCRVβ 2     | PE + FITC | MPB2D5    | Beckman Coulter |             |
| TCRVβ 12    | FITC      | VER2.32   | Beckman Coulter |             |
| TCRVβ 23    | PE        | AF23      | Beckman Coulter | 10 (Tube F) |
| TCRVβ 1     | PE + FITC | BL37.2    | Beckman Coulter |             |
| TCRVβ 21.3  | FITC      | IG125     | Beckman Coulter |             |
| TCRVβ 11    | PE        | C21       | Beckman Coulter | 10 (Tube G) |
| TCR-Vβ 22   | PE + FITC | IMMU546   | Beckman Coulter |             |
| TCR-Vβ 14   | FITC      | CAS1.1.3  | Beckman Coulter |             |
| TCR-Vβ 13.2 | PE        | H132      | Beckman Coulter | 10 (Tube H) |
| TCR-Vβ 4    | PE + FITC | WJF24     | Beckman Coulter |             |
| TCR-Vβ 7.2  | FITC      | ZIZOU4    | Beckman Coulter |             |

Abbreviations (alphabetical order): APC, allophycocyanin; H7, Hilite®7; BD, Becton/Dickinson Biosciences; BV, Brilliant Violet™; Dy, dyomics; FITC, fluorescein isothiocyanate; PacB, Pacific Blue™; PE, phycoerythrin; Cy5.5, cyanin 5.5; Cy7, cyanin 7; PerCP, peridinin-chlorophyll; TCR, T-cell receptor.

**Table S3.** Detailed immunophenotypic features of T-cell subsets showing extreme TRBC1<sup>+</sup> percentages within the more mature polyclonal and monoclonal Tαβ-cell populations expressing a specific TCRVβ family.

| n. sample | Study group | Maturation Stage | TCRVβ family        | n. cells / μL | %TRBC1 <sup>+</sup> | Phenotype                                                                                                                                                                    | Aberrant phenotype |
|-----------|-------------|------------------|---------------------|---------------|---------------------|------------------------------------------------------------------------------------------------------------------------------------------------------------------------------|--------------------|
| #1        | HD          | TE               | Vβ13.1 <sup>+</sup> | 11            | 7.1%                | CD2 <sup>lo</sup> CD3 <sup>+</sup> CD4 <sup>-</sup> CD5 <sup>lo</sup> CD7 <sup>+</sup> CD8 <sup>+</sup><br>CD45RA <sup>+</sup> CD62L <sup>-</sup>                            | No                 |
| #2        | HD          | TE               | Vβ7.2 <sup>lo</sup> | 12            | 14%                 | CD2 <sup>lo</sup> CD3 <sup>lo</sup> CD4 <sup>-</sup> CD5 <sup>lo</sup> CD7 <sup>++</sup> CD8 <sup>+</sup><br>CD45RA <sup>+</sup> CD62L <sup>+</sup> NKp80 <sup>+</sup>       | No                 |
| #3        | HD          | TE               | Vβ17 <sup>+/+</sup> | 13            | 18%                 | CD2 <sup>lo/+</sup> CD3 <sup>+</sup> CD4 <sup>-</sup> CD5 <sup>+</sup> CD7 <sup>+</sup> CD8 <sup>+</sup><br>CD45RA <sup>+</sup> CD62L <sup>het</sup>                         | No                 |
| #1        | HD          | TE               | Vβ3 <sup>lo/+</sup> | 14            | 91%                 | CD2 <sup>+</sup> CD3 <sup>+</sup> CD4 <sup>+</sup> CD5 <sup>+</sup> CD7 <sup>-</sup> CD8 <sup>-</sup><br>CD45RA <sup>lo</sup> CD62L <sup>+</sup>                             | No                 |
| #4        | HD          | TE               | Vβ5.1 <sup>++</sup> | 14            | 0.24%               | CD2 <sup>lo/+</sup> CD3 <sup>+</sup> CD4 <sup>-</sup> CD5 <sup>+</sup> CD7 <sup>lo</sup> CD8 <sup>-/lo</sup><br>CD45RA <sup>+</sup> CD62L <sup>+</sup> NKp80 <sup>+</sup>    | No                 |
| #2        | HD          | TE               | Vβ22 <sup>++</sup>  | 15            | 0%                  | CD2 <sup>lo/+</sup> CD3 <sup>+</sup> CD4 <sup>-</sup> CD5 <sup>-/lo</sup> CD7 <sup>lo</sup> CD8 <sup>+</sup><br>CD45RA <sup>lo</sup> CD62L <sup>-</sup> NKp80 <sup>het</sup> | No                 |
| #3        | HD          | TE               | Vβ3 <sup>+</sup>    | 16            | 2.2%                | CD2 <sup>lo</sup> CD3 <sup>+</sup> CD4 <sup>-</sup> CD5 <sup>+</sup> CD7 <sup>+</sup> CD8 <sup>+</sup><br>CD45RA <sup>+</sup> CD62L <sup>-</sup>                             | No                 |
| #1        | HD          | TE               | Vβ17 <sup>+</sup>   | 25            | 1.4%                | CD2 <sup>lo</sup> CD3 <sup>+/+</sup> CD4 <sup>-</sup> CD5 <sup>lo</sup> CD7 <sup>+</sup> CD8 <sup>-</sup><br>CD45RA <sup>++</sup> CD62L <sup>-</sup>                         | No                 |
| #1        | HD          | TE               | Vβ14 <sup>+</sup>   | 26            | 93%                 | CD2 <sup>+</sup> CD3 <sup>lo</sup> CD4 <sup>-</sup> CD5 <sup>-</sup> CD7 <sup>++</sup> CD8 <sup>lo</sup><br>CD45RA <sup>lo</sup> CD62L <sup>-</sup>                          | No                 |
| #5        | Reactive*   | TE               | Vβ13.1 <sup>+</sup> | 19            | 99%                 | CD2 <sup>+</sup> CD3 <sup>lo</sup> CD4 <sup>+</sup> CD5 <sup>++</sup> CD7 <sup>-</sup> CD8 <sup>-</sup><br>CD45RA <sup>lo</sup> CD62L <sup>het</sup>                         | No                 |
| #5        | HDc         | TE               | Vβ8 <sup>lo</sup>   | 33            | 98%                 | CD2 <sup>lo</sup> CD3 <sup>lo</sup> CD4 <sup>-</sup> CD5 <sup>-/lo</sup> CD7 <sup>lo</sup> CD8 <sup>+</sup><br>CD45RA <sup>++</sup> CD62L <sup>-</sup>                       | Yes                |
| #6        | HDc         | TE               | Vβ22 <sup>+</sup>   | 184           | 99.9%               | CD2 <sup>+</sup> CD3 <sup>++</sup> CD4 <sup>-</sup> CD5 <sup>-/lo</sup> CD7 <sup>-/lo</sup> CD8 <sup>lo</sup>                                                                | Yes                |

|     |      |    |                   |       |       | CD45RA <sup>+/++</sup> CD57 <sup>+</sup> CD94 <sup>+</sup> cyGra <sup>+</sup> cyPerf <sup>+</sup>                                                                                                           |     |
|-----|------|----|-------------------|-------|-------|-------------------------------------------------------------------------------------------------------------------------------------------------------------------------------------------------------------|-----|
| #7  | LGLL | TE | Vβ22 <sup>+</sup> | 350   | 1.6%  | CD2 <sup>+</sup> CD3 <sup>+</sup> CD4 <sup>+</sup> CD5 <sup>het</sup> CD7 <sup>lo</sup> CD8 <sup>+</sup><br>CD45RA <sup>lo</sup> CD57 <sup>+</sup> CD94 <sup>+</sup> cyGra <sup>+</sup> cyPerf <sup>+</sup> | No  |
| #8  | LGLL | TE | Vβ1 <sup>+</sup>  | 691   | 0.14% | CD2 <sup>lo</sup> CD3 <sup>++</sup> CD4 <sup>+</sup> CD5 <sup>lo</sup> CD7 <sup>+</sup> CD8 <sup>+</sup><br>CD45RA <sup>+</sup> CD57 <sup>+</sup> CD94 <sup>+</sup> cyGra <sup>+</sup> cyPerf <sup>+</sup>  | No  |
| #9  | LGLL | TE | Vβ16 <sup>+</sup> | 929   | 98%   | CD2 <sup>lo</sup> CD3 <sup>+</sup> CD4 <sup>+</sup> CD5 <sup>lo</sup> CD7 <sup>+</sup> CD8 <sup>-/lo</sup><br>CD45RA <sup>+</sup> CD57 <sup>+</sup> CD94 <sup>+</sup>                                       | Yes |
| #10 | LGLL | TE | Vβ14 <sup>+</sup> | 5,516 | 99.6% | CD2 <sup>+</sup> CD3 <sup>+</sup> CD4 <sup>+</sup> CD5 <sup>-/lo</sup> CD7 <sup>-/lo</sup> CD8 <sup>+</sup><br>CD57 <sup>het</sup> CD94 <sup>+</sup> cyGra <sup>+</sup> cyPerf <sup>+</sup>                 | No  |

\* Residual (reactive) polyclonal Tαβ-cell populations from a HDc. HD were selected based on the absolute number of TE Tαβ cells (>10 cells/μL). Abbreviations (alphabetical order): cy, cytoplasmic; Gra, granzyme B; HD, healthy donor; HDc, healthy donor with a small Tαβ-cell clone in blood; het, heterogeneous expression; lo, low expression; n., number; LGLL, large granular lymphocyte leukemia; Perf, perforin; TE, terminal effector.

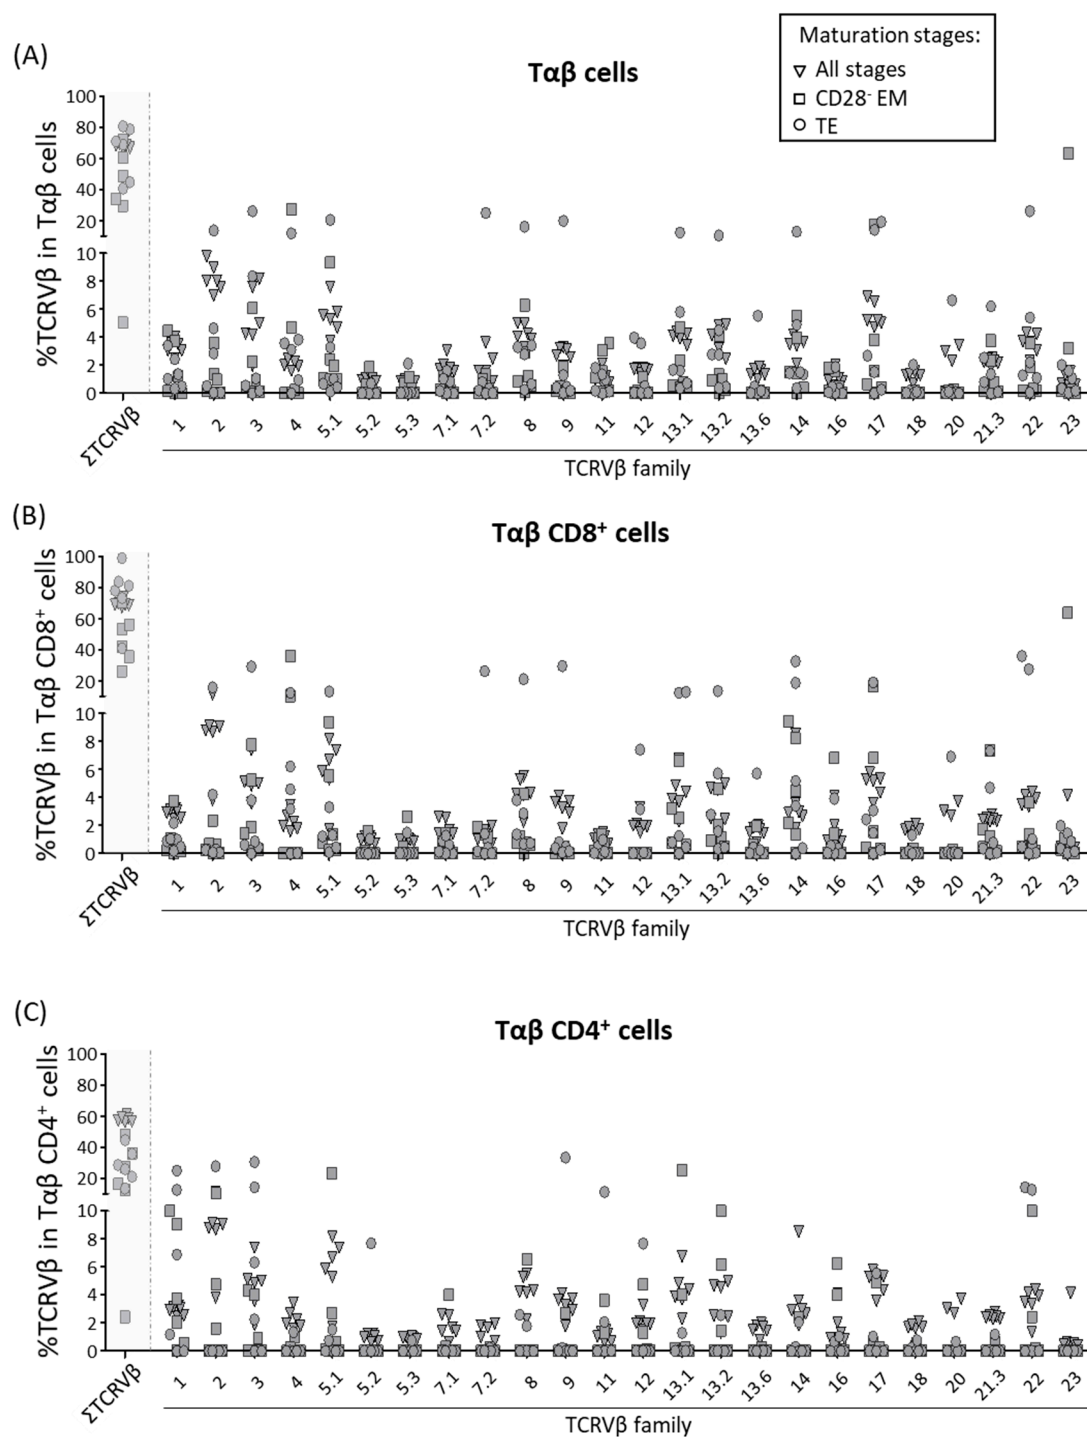

**Figure S1.** Distribution of T-cells expressing different TCRVβ families among total Tαβ cells and their Tαβ CD8<sup>+</sup> and Tαβ CD4<sup>+</sup> cell subsets and their maturation-associated stages of CD28<sup>+</sup> effector memory and terminal effector cells as identified in blood of healthy donors ( $n = 6$ ). Abbreviations (alphabetical order): EM, effector memory; TE, terminal effector.
